# Supplementary material for: On the Aromaticity and 13C-NMR Pattern of Pentagonal-Pyramidal Hexamethylbenzene Dication [C6(CH3)6]2+: A {C5(CH3)5}−–{CCH3}3+ Aggregate
Source: MDPI journal article supplement (doi:10.3390/chemistry3040097), 2021-11-11
Supplement: s1 [file s1]

Supporting information for:

# On the Aromaticity and $^{13}\text{C}$ -NMR pattern of Pentagonal-Pyramidal Hexamethylbenzene Dication $\text{C}_6(\text{CH}_3)_6^{2+}$ . A $\text{C}_5(\text{CH}_3)_5^-$ - $\text{CCH}_3^{3+}$ Aggregate

Desmond MacLeod Carey and Alvaro Muñoz-Castro \*

Laboratorio de Química Inorgánica y Materiales Moleculares, Universidad Autónoma de Chile, Llano Subercaceaux 2801, San Miguel, Santiago, Chile.

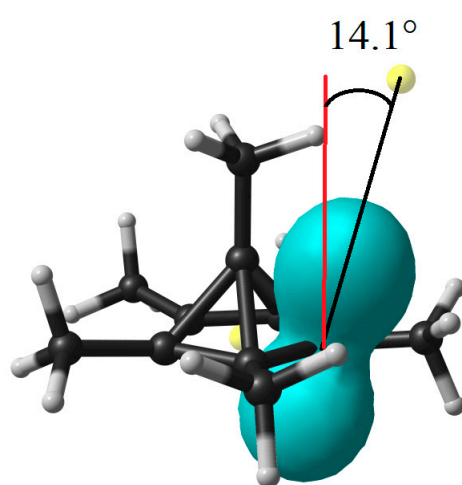

**Figure S1.** Determination of the tilt angle for the CSA tensor of a representative carbon atom at  $\text{C}_5$  moiety in the  $\text{C}_6(\text{CH}_3)_6^{2+}$  structure. Red line shows a perfectly parallel orientation.
